# Supplementary material
Source: PubMed Central journal article supplement (PMC1502311)

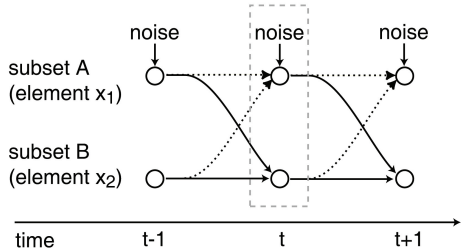

(a). states of A are replaced by noise

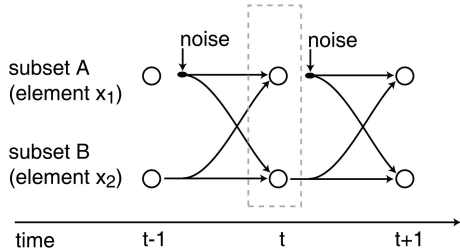

(b) outputs from A are replaced by noise

Supplement: pnas_0604347103_2.pdf [file pnas_0604347103_2.pdf]
